# Supplementary material for: Owners’ Attitudes toward Their Companion Dogs Are Associated with the Owners’ Depression Symptoms—An Exploratory Study in South Korea
Source: MDPI journal article supplement (doi:10.3390/ijerph16193567), 2019-09-24
Supplement: s1 [file s1]

1 **Table S1** Generalized variance inflation factors of each explanatory variable

| <b>Variables</b>   | <b>GVIF</b> | <b>DF</b> | <b>GVIF<sup>1/(2*df)</sup></b> |
|--------------------|-------------|-----------|--------------------------------|
| <b>Model 1</b>     |             |           |                                |
| PAS-M (continuous) | 1.133       | 1         | 1.065                          |
| Age                | 1.339       | 1         | 1.157                          |
| Sex                | 1.154       | 1         | 1.074                          |
| Education          | 1.115       | 1         | 1.056                          |
| Income             | 1.165       | 2         | 1.039                          |
| Marital status     | 1.300       | 1         | 1.140                          |
| Employment         | 1.018       | 1         | 1.009                          |
| Family size        | 1.156       | 1         | 1.075                          |
| <b>Model 2</b>     |             |           |                                |
| PAS-M              | 1.092       | 1         | 1.045                          |
| Age                | 1.334       | 1         | 1.155                          |
| Sex                | 1.129       | 1         | 1.063                          |
| Education          | 1.111       | 1         | 1.054                          |
| Income             | 1.168       | 2         | 1.040                          |
| Marital status     | 1.276       | 1         | 1.130                          |
| Employment         | 1.018       | 1         | 1.009                          |
| Family size        | 1.157       | 1         | 1.076                          |
| <b>Model 3</b>     |             |           |                                |
| PAS-M (continuous) | 1.116       | 1         | 1.056                          |
| Age                | 1.324       | 1         | 1.151                          |
| Sex                | 1.137       | 1         | 1.066                          |
| Education          | 1.110       | 1         | 1.054                          |
| Income             | 1.170       | 2         | 1.040                          |
| Marital status     | 1.280       | 1         | 1.132                          |
| Employment         | 1.016       | 1         | 1.008                          |
| Family size        | 1.155       | 1         | 1.075                          |
| <b>Model 4</b>     |             |           |                                |
| PAS-M              | 1.087       | 1         | 1.043                          |
| Age                | 1.328       | 1         | 1.152                          |
| Sex                | 1.114       | 1         | 1.055                          |
| Education          | 1.111       | 1         | 1.054                          |
| Income             | 1.171       | 2         | 1.040                          |
| Marital status     | 1.270       | 1         | 1.127                          |
| Employment         | 1.017       | 1         | 1.008                          |
| Family size        | 1.153       | 1         | 1.074                          |

2  
3  
4  
5

**Table S2.** Robustness of the association between owner's depression symptoms and the modified Pet Attitude Score (Model 1)

| Explanatory variables | Model 1 <sup>1</sup> |             | Model S1.1 <sup>2</sup> |             | Model S1.2 <sup>3</sup> |             |
|-----------------------|----------------------|-------------|-------------------------|-------------|-------------------------|-------------|
|                       | OR                   | 95% CI      | OR                      | 95% CI      | OR                      | 95% CI      |
| PAS-M                 | 0.95                 | 0.94 - 0.96 | 0.95                    | 0.94 - 0.96 | 0.95                    | 0.94 - 0.96 |
| Age                   |                      |             |                         |             |                         |             |
| 19-29                 | Ref                  | -           |                         |             | Ref                     | -           |
| 30-39                 | 1.28                 | 0.85 - 1.95 |                         |             | 1.12                    | 0.78 - 1.63 |
| Sex                   |                      |             |                         |             |                         |             |
| male                  | Ref                  | -           |                         |             | Ref                     | -           |
| female                | 1.37                 | 0.97 - 1.96 |                         |             | 1.38                    | 0.98 - 1.96 |
| Education             |                      |             |                         |             |                         |             |
| high school or less   | Ref                  | -           |                         |             |                         |             |
| university of more    | 0.95                 | 0.57 - 1.57 |                         |             |                         |             |
| Income                |                      |             |                         |             |                         |             |
| low tertile           | Ref                  | -           |                         |             |                         |             |
| middle tertile        | 0.88                 | 0.58 - 1.34 |                         |             |                         |             |
| high tertile          | 0.73                 | 0.48 - 1.12 |                         |             |                         |             |
| Marital status        |                      |             |                         |             |                         |             |
| single                | Ref                  | -           |                         |             |                         |             |
| married               | 0.81                 | 0.56 - 1.18 |                         |             |                         |             |
| Employment            |                      |             |                         |             |                         |             |
| unemployed            | Ref                  | -           |                         |             |                         |             |
| employed              | 0.94                 | 0.58 - 1.53 |                         |             |                         |             |
| Family size           |                      |             |                         |             |                         |             |
| one or two            | Ref                  | -           |                         |             |                         |             |
| three or more         | 1.22                 | 0.80 - 1.86 |                         |             |                         |             |
| AIC                   | 851.19               |             | 842.8                   |             | 843.39                  |             |

*Note:* CESD-10 was used to measure owners' depression symptoms (scores higher than 10 categorized as having depression symptoms), and the modified Pet Attitude Scale (PAS-M) was included as a continuous variable

<sup>1</sup> Model 1: Adjusted for demographic and socioeconomic factors (age, sex, education level, income, marital status, and employment; <sup>2</sup>Model S1.1: Univariate analysis; <sup>3</sup>Model S1.2: Adjust for demographic factors (age and sex)

**Table S3.** Robustness of the association between owner's depression symptom and the modified Pet Attitude Score (Model 2)

| Explanatory variables | Model 2 <sup>1</sup> |             | Model S2.1 <sup>2</sup> |             | Model S2.2 <sup>3</sup> |             |
|-----------------------|----------------------|-------------|-------------------------|-------------|-------------------------|-------------|
|                       | OR                   | 95% CI      | OR                      | 95% CI      | OR                      | 95% CI      |
| PAS-M*                |                      |             |                         |             |                         |             |
| high (>89)            | Ref                  | -           | Ref                     | -           | Ref                     | -           |
| low (≤89)             | 3.19                 | 2.28 - 4.47 | 3.15                    | 2.29 - 4.35 | 3.28                    | 2.36 - 4.58 |
| Age                   |                      |             |                         |             |                         |             |
| 19-29                 | Ref                  | -           |                         |             | Ref                     | -           |
| 30-39                 | 1.22                 | 0.81 - 1.84 |                         |             | 1.09                    | 0.76 - 1.58 |
| Sex                   |                      |             |                         |             |                         |             |
| male                  | Ref                  | -           |                         |             | Ref                     | -           |
| female                | 1.24                 | 0.88 - 1.75 |                         |             | 1.24                    | 0.89 - 1.75 |
| Education             |                      |             |                         |             |                         |             |
| high school or less   | Ref                  | -           |                         |             |                         |             |
| university of more    | 0.94                 | 0.57 - 1.54 |                         |             |                         |             |
| Income                |                      |             |                         |             |                         |             |
| low tertile           | Ref                  | -           |                         |             |                         |             |
| middle tertile        | 0.85                 | 0.56 - 1.29 |                         |             |                         |             |
| high tertile          | 0.70                 | 0.46 - 1.07 |                         |             |                         |             |
| Marital status        |                      |             |                         |             |                         |             |
| single                | Ref                  | -           |                         |             |                         |             |
| married               | 0.89                 | 0.62 - 1.28 |                         |             |                         |             |
| Employment            |                      |             |                         |             |                         |             |
| unemployed            | Ref                  | -           |                         |             |                         |             |
| employed              | 0.93                 | 0.57 - 1.49 |                         |             |                         |             |
| Family size           |                      |             |                         |             |                         |             |
| one or two            | Ref                  | -           |                         |             |                         |             |
| three or more         | 1.29                 | 0.85 - 1.97 |                         |             |                         |             |
| AIC                   | 865.28               |             | 855.20                  |             | 857.57                  |             |

*Note:* CESD-10 was used to measure owners' depression symptoms (scores higher than 10 categorized as having depression symptoms), and the modified Pet Attitude Scale (PAS-M) was categorized based on the median value, which was 89

<sup>1</sup> Model 2: Adjusted for demographic and socioeconomic factors (age, sex, education level, income, marital status, and employment; <sup>2</sup>Model S2.1: Univariate analysis; <sup>3</sup>Model S2.2: Adjust for demographic factors (age and sex)

**Table S4.** Robustness of the association between owner's depression symptom and the modified Pet Attitude Score (Model 3)

| Explanatory variables | Model 3 <sup>1</sup> |               | Model S3.1 <sup>2</sup> |               | Model S3.2 <sup>3</sup> |               |
|-----------------------|----------------------|---------------|-------------------------|---------------|-------------------------|---------------|
|                       | $\beta$              | 95% CI        | $\beta$                 | 95% CI        | $\beta$                 | 95% CI        |
| PAS-M*                | -0.11                | -0.15 – -0.08 | -0.11                   | -0.14 – -0.08 | -0.12                   | -0.15 – -0.09 |
| Age                   |                      |               |                         |               |                         |               |
| 19-29                 | Ref                  | -             |                         |               | Ref                     | -             |
| 30-39                 | 0.41                 | -0.65 – 1.48  |                         |               | -0.22                   | -0.17 – 0.74  |
| Sex                   |                      |               |                         |               |                         |               |
| male                  | Ref                  | -             |                         |               | Ref                     | -             |
| female                | 0.86                 | -0.03 – 1.75  |                         |               | 0.88                    | -0.01 – 1.78  |
| Education             |                      |               |                         |               |                         |               |
| high school or less   | Ref                  | -             |                         |               |                         |               |
| university of more    | -0.65                | -1.93 – 0.64  |                         |               |                         |               |
| Income                |                      |               |                         |               |                         |               |
| low tertile           | Ref                  | -             |                         |               |                         |               |
| middle tertile        | -0.48                | -1.55 – 0.59  |                         |               |                         |               |
| high tertile          | -1.09                | -2.18 – 0.01  |                         |               |                         |               |
| Marital status        |                      |               |                         |               |                         |               |
| single                | Ref                  | -             |                         |               |                         |               |
| married               | -0.86                | -1.08 – 0.08  |                         |               |                         |               |
| Employment            |                      |               |                         |               |                         |               |
| unemployed            | Ref                  | -             |                         |               |                         |               |
| employed              | -0.62                | -1.86 – 0.63  |                         |               |                         |               |
| Family size           |                      |               |                         |               |                         |               |
| one or two            | Ref                  | -             |                         |               |                         |               |
| three or more         | 0.48                 | -0.62 – 1.57  |                         |               |                         |               |
| AIC                   | 4079.71              |               | 4079.44                 |               | 4078.84                 |               |

*Note:* CESD-10 was used to measure owners' depression symptoms and included as a continuous variable. The modified Pet Attitude Scale (PAS-M) was included as a continuous variable

<sup>1</sup> Model 3: Adjusted for demographic and socioeconomic factors (age, sex, education level, income, marital status, and employment; <sup>2</sup>Model S3.1: Univariate analysis; <sup>3</sup>Model S3.2: Adjust for demographic factors (age and sex)

**Table S5.** Robustness of the association between owner's depression symptom and the modified Pet Attitude Score (Model 4)

| Explanatory variables | Model 4 <sup>1</sup> |               | Model S4.1 <sup>2</sup> |             | Model S4.2 <sup>3</sup> |              |
|-----------------------|----------------------|---------------|-------------------------|-------------|-------------------------|--------------|
|                       | $\beta$              | 95% CI        | $\beta$                 | 95% CI      | $\beta$                 | 95% CI       |
| PAS-M*                |                      |               |                         |             |                         |              |
| high (>89)            | Ref                  | -             | Ref                     | -           | Ref                     | -            |
| low ( $\leq$ 89)      | 2.67                 | 1.79 – 3.54   | 2.61                    | 1.77 - 3.46 | 2.77                    | 1.91 – 3.64  |
| Age                   |                      |               |                         |             |                         |              |
| 19-29                 | Ref                  | -             |                         |             | Ref                     | -            |
| 30-39                 | 0.30                 | -0.78 – 1.38  |                         |             | -0.28                   | -1.25 – 0.69 |
| Sex                   |                      |               |                         |             |                         |              |
| male                  | Ref                  | -             |                         |             | Ref                     | -            |
| female                | 0.61                 | -0.28 – 1.50  |                         |             | 0.64                    | -0.26 – 1.53 |
| Education             |                      |               |                         |             |                         |              |
| high school or less   | Ref                  | -             |                         |             |                         |              |
| university of more    | -0.67                | -1.97 – 0.63  |                         |             |                         |              |
| Income                |                      |               |                         |             |                         |              |
| low tertile           | Ref                  | -             |                         |             |                         |              |
| middle tertile        | -0.57                | -1.65 – 0.51  |                         |             |                         |              |
| high tertile          | -1.20                | -2.31 – -0.09 |                         |             |                         |              |
| Marital status        |                      |               |                         |             |                         |              |
| single                | Ref                  | -             |                         |             |                         |              |
| married               | -0.68                | -1.62 – 0.27  |                         |             |                         |              |
| Employment            |                      |               |                         |             |                         |              |
| unemployed            | Ref                  | -             |                         |             |                         |              |
| employed              | -0.65                | -1.91 – 0.61  |                         |             |                         |              |
| Family size           |                      |               |                         |             |                         |              |
| one or two            | Ref                  | -             |                         |             |                         |              |
| three or more         | 0.61                 | -0.49 – 1.72  |                         |             |                         |              |
| AIC                   | 4093.99              |               | 4091.36                 |             | 4092.57                 |              |

*Note:* CESD-10 was used to measure owners' depression symptoms and included as a continuous variable. The modified Pet Attitude Scale (PAS-M) was categorized based on the median value, which was 89

<sup>1</sup> Model 4: Adjusted for demographic and socioeconomic factors (age, sex, education level, income, marital status, and employment; <sup>2</sup>Model S4.1: Univariate analysis; <sup>3</sup>Model S4.2: Adjust for demographic factors (age and sex)
